# Supplementary material for: Sensorial and Volatile Analysis of Wines Made from Partially Dehydrated Grapes: An Ontario Case Study
Source: Hindawi journal article supplement (doi:10.1155/2020/8861185), 2020-12-24
Supplement: f1 [file 8861185.f1.docx]

## Supplementary Materials

Table S1: Categories, CAS Numbers, odour descriptors and sensory threshold (μg/L) of all Volatile Organic Compounds and Volatile Fatty Acids measured in wines made from partially dehydrated grapes.

| Category | Compound | CAS Number | Sensory Threshold | Purity (%) | Odour Descriptor | Source |
| --- | --- | --- | --- | --- | --- | --- |
| *Volatile Organic Compounds (VOCs)* | | | | |  |
| Internal Standard | d11 Ethyl hexanoate ISTD | 2159-19-5 | N/A | 98.7 | N/A | CDN Isotopes, Pointe-Claire, Quebec, Canada. |
| Octanal-*d*16 ISTD | 1219794-66-7 | N/A | 98 | N/A | CDN Isotopes, Pointe-Claire, Quebec, Canada. |
| Acetate Ester | Isoamyl acetate | 123-92-2 | 30a | 97 | Fruity, bananab | SAFC, St. Louis, MO, USA |
| Ethyl Esters | Ethyl isobutyrate | 97-62-1 | 15a | 99 | Sweet, rubberc | Sigma Aldrich |
| Ethyl butyrate | 105-55-4 | 20d | 99 | Applec | Sigma Aldrich |
| Ethyl isovalerate | 108-64-5 | 3a | 98 | Fruity, sweete | Sigma Aldrich |
| Ethyl octanoate | 106-32-1 | 580f | >99 | Fruity, strawberry, sweete | Sigma Aldrich |
| Ethyl 2-methyl butyrate | 7452-79-1 | 18a | 99 | Fruity, sweet, applee | Sigma Aldrich |
| Ethyl hexanoate | 123-66-0 | 14g | 99 | Green appleg | Sigma Aldrich |
| Alcohol | Hexanol | 111-23-3 | 8000a | 99.5 | Herbaceous, resin, flowerb | Sigma Aldrich |
| 2- Phenylethanol | 60-12-8 | 14,000a | 99 | Floral, rose, honey, spicee,h | Sigma Aldrich |
| *Volatile Fatty Acids (VFAs)* | | | | | |  |
|  | Hexanoic Acid | 142-62-1 | 420a | 99.5 | Sweate | Sigma Aldrich |
| Octanoic Acid | 124-07-2 | 500a | 99.5 | Sweat, cheesee | Sigma Aldrich |

a [65] (determined in 11% ethanol/water solution with 7 g/L glycerol and 5 g/L tartaric acid at pH 3.4)

b [14]

c [66]

d [1] (determined in 10% ethanol/water solution)

e [5]

f [67] Etievant, 1991)

g [30]

h [41]

Table S2: Volatile aroma compounds, retention times, target and confirming ions, standard curves, % recovery, calibration ranges and % coefficient of variation (CV).

| Compound | Retention Time (min) | Target Ion (*m/z*) | Standard Curve (R2) | % Recovery | Calibration Range  Lowest to Highest  (μg/L) | %CV | LOQ  (µg/L) |
| --- | --- | --- | --- | --- | --- | --- | --- |
| 2- Phenylethanol* | 47.1 | 91 | 0.9974 | 116 | 720.3-11024.5 | 3-11, Average: 7.4 | 720.3 |
| Ethyl isobutyrate* | 12.7 | 71 | 0.9907 | 109 | 3.2-38.2 | 3-16, Average: 9.5 | 3.2 |
| Ethyl butyrate | 14.9 | 88 | 0.9919 | 104 | 5.2-62.2 | 3-13, Average: 6.6 | 5.2 |
| Ethyl isovalerate | 17.6 | 88 | 0.9917 | 96 | 1.1-12.7 | 5-11, Average: 8.1 | 1.1 |
| Ethyl octanoate | 40.5 | 88 | 0.9956 | 111 | 6.4-75.7 | 2-11, Average: 6.3 | 6.4 |
| Ethyl 2-methylbutryate | 17.3 | 57 | 0.9942 | 98 | 0.5-5.9 | 3-7, Average: 4.6 | 0.5 |
| Isoamyl acetate*^ | 19.0 | 87 | 0.9944 | 97 | 1.6-37.6 | 3-18, Average: 5.0 | 1.6 |
| Hexanol | 21.1 | 56 | 0.9967 | 102 | 36.4-433.6 | 2-9, Average: 5.1 | 36.5 |
| Ethyl hexanoate^ | 25.6 | 99 | 0.9992 | 103 | 6.0-142.1 | 1-16, Average: 5 | 6.0 |
| Hexanoic Acid | 14.9 | 60 | 0.9933 | 116 | 28.6-226.2 | 4-19, Average: 7.0 | 28.6 |
| Octanoic Acid | 17.9 | 60 | 0.9944 | 127 | 28.6-226.2 | 2-12, Average: 6.1 | 28.6 |

*Curve has been adjusted from original standard curve based on sample concentrations

^Additional standard added to capture low-end concentrations based on sample concentrations

%cv= Standard deviation / mean of 8 data points (2x2 winemaking replicates, 2 bottles in measured in duplicate)

Table S3: Output of 3-way ANOVA [Factors=Tasting replicate, Judge, Wine] and interactions amongst factors (p<0.05).

| Attribute |  | Tasting Replicate | Judge | Wine | Tasting Replicate*  Judge | Tasting Replicate  *Wine | Judge*Wine |
| --- | --- | --- | --- | --- | --- | --- | --- |
| Green Pepper Aroma | F-Value | 0.47 | 35.05 | 3.05 | 0.77 | 1.69 | 1.04 |
| *p*-Value | 0.492 | < 0.0001 | 0.010 | 0.654 | 0.136 | 0.413 |
| Spice Aroma | F-Value | 0.68 | 17.37 | 1.10 | 0.96 | 0.34 | 1.40 |
| *p*-Value | 0.410 | < 0.0001 | 0.358 | 0.480 | 0.888 | 0.045 |
| Red Fruit Aroma (Cooked/  Dried/Fresh) | F-Value | 0.65 | 23.14 | 5.41 | 1.51 | 0.43 | 1.25 |
| *p*-Value | 0.422 | < 0.0001 | < 0.0001 | 0.136 | 0.827 | 0.135 |
| Black Fruit Aroma | F-Value | 0.19 | 19.73 | 1.24 | 0.93 | 0.61 | 1.62 |
| *p*-Value | 0.662 | < 0.0001 | 0.292 | 0.510 | 0.690 | 0.008 |
| Herbal Aroma | F-Value | 0.09 | 22.72 | 0.45 | 0.94 | 0.60 | 1.11 |
| *p*-Value | 0.767 | < 0.0001 | 0.815 | 0.501 | 0.697 | 0.301 |
| Canned Green Vegetable Aroma | F-Value | 0.05 | 23.56 | 5.83 | 2.19 | 1.46 | 1.78 |
| *p*-Value | 0.830 | < 0.0001 | < 0.0001 | 0.018 | 0.203 | 0.002 |
| Earthy/  Toasty Aroma | F-Value | 0.23 | 26.26 | 5.42 | 1.74 | 0.48 | 1.44 |
| *p*-Value | 0.633 | < 0.0001 | < 0.0001 | 0.071 | 0.789 | 0.034 |
| Candy/  Confection Aroma | F-Value | 3.26 | 27.91 | 3.88 | 0.65 | 0.69 | 1.05 |
| *p*-Value | 0.072 | < 0.0001 | 0.002 | 0.775 | 0.633 | 0.391 |
| Floral Aroma | F-Value | 0.19 | 12.68 | 2.32 | 0.86 | 0.18 | 1.39 |
| *p*-Value | 0.665 | < 0.0001 | 0.043 | 0.575 | 0.969 | 0.050 |
| Leather/  Meat Aroma | F-Value | 0.01 | 35.38 | 2.81 | 0.55 | 0.23 | 1.51 |
| *p*-Value | 0.918 | < 0.0001 | 0.017 | 0.856 | 0.949 | 0.021 |
| Red Fruit Flavour (Cooked/  Dried/Fresh) | F-Value | 1.67 | 26.04 | 0.95 | 1.23 | 0.92 | 1.01 |
| *p*-Value | 0.197 | < 0.0001 | 0.451 | 0.274 | 0.466 | 0.453 |
| Confection Flavour | F-Value | 0.52 | 73.00 | 2.78 | 1.14 | 0.44 | 2.43 |
| *p*-Value | 0.473 | < 0.0001 | 0.018 | 0.330 | 0.817 | < 0.0001 |
| Black Fruit Flavour | F-Value | 1.10 | 27.29 | 6.67 | 0.45 | 0.96 | 1.68 |
| *p*-Value | 0.294 | < 0.0001 | < 0.0001 | 0.919 | 0.440 | 0.005 |
| Spice Flavour | F-Value | 1.12 | 30.78 | 2.89 | 1.29 | 0.44 | 0.81 |
| *p*-Value | 0.291 | < 0.0001 | 0.015 | 0.235 | 0.820 | 0.821 |
| Vegetal Flavour | F-Value | 1.87 | 74.81 | 2.52 | 2.93 | 0.52 | 1.47 |
| *p*-Value | 0.173 | < 0.0001 | 0.029 | 0.002 | 0.762 | 0.027 |
| Herbal Flavour | F-Value | 0.01 | 55.60 | 2.95 | 1.27 | 1.19 | 1.23 |
| *p*-Value | 0.914 | < 0.0001 | 0.013 | 0.244 | 0.316 | 0.148 |
| Earthy/  Toast Flavour | F-Value | 0.11 | 0.11 | 0.11 | 0.11 | 0.11 | 0.11 |
| *p*-Value | 0.746 | < 0.0001 | < 0.0001 | 0.015 | 0.360 | 0.165 |
| Astringency | F-Value | 0.00 | 68.22 | 3.08 | 2.79 | 1.38 | 1.91 |
| *p*-Value | 0.972 | < 0.0001 | 0.010 | 0.003 | 0.230 | 0.001 |
| Alcohol | F-Value | 0.37 | 52.30 | 24.72 | 1.72 | 2.28 | 1.56 |
| *p*-Value | 0.546 | < 0.0001 | < 0.0001 | 0.075 | 0.047 | 0.013 |
| Acidity | F-Value | 1.81 | 98.46 | 7.77 | 1.72 | 1.31 | 1.27 |
| *p*-Value | 0.179 | < 0.0001 | < 0.0001 | 0.075 | 0.261 | 0.120 |
| Bitterness | F-Value | 1.84 | 41.42 | 1.29 | 0.49 | 1.00 | 1.44 |
| *p*-Value | 0.176 | < 0.0001 | 0.270 | 0.895 | 0.417 | 0.036 |
| Length of Finish | F-Value | 2.78 | 8.36 | 17.68 | 1.42 | 0.65 | 1.26 |
| *p*-Value | 0.096 | < 0.0001 | < 0.0001 | 0.171 | 0.663 | 0.122 |

Table S4: Mean intensity ratings for each sensory descriptive attribute.

Lowercase letters indicate statistical differences within the same attribute indicate differences between winemaking treatments (yeast strain and starting sugar concentration) determined by analysis of variance with mean separation by Fisher’s Least Significant Difference (LSD; *p*< 0.05).

| Aroma | | | | | |
| --- | --- | --- | --- | --- | --- |
| Treatment | Green Pepper | Spice | Red Fruit (Cooked/  Dried/Fresh) | Black Fruit | Herbal |
| EC1118 Control | 2.2 b | 4.9 a | 8.2 a | 5.8 a | 4.6 a |
| CN1 Control | 2.8 a,b | 5.0 a | 7.7 a,b | 5.2 a | 5.0 a |
| EC1118 26.0°Brix | 2.9 a | 4.7 a | 6.9 b,c,d | 5.0 a | 4.8 a |
| CN1 26.0°Brix | 3.1 a | 5.2 a | 7.2 b,c | 5.7 a | 5.1 a |
| EC1118 27.5°Brix | 3.4 a | 5.6 a | 6.5 c,d | 5.5 a | 5.3 a |
| CN127.5°Brix | 3.2 a | 5.6 a | 6.2 d | 5.9 a | 5.1 a |
| Aroma | | | | | |
| Treatment | Canned Green Vegetable | Earthy/  Toast | Candy/  Confection | Floral | Leather/  Meat |
| EC1118 Control | 2.4 c | 3.7 d | 5.5 a | 4.2 a | 1.7 b |
| CN1 Control | 2.9 b,c | 4.2 cd | 4.9 a,b | 3.0 b | 2.1 b |
| EC1118 26.0°Brix | 3.5 a,b | 4.7 b,c | 4.1 b,c | 3.8 a,b | 2.0 b |
| CN1 26.0°Brix | 2.8 b,c | 5.2 ab | 4.0 b,c | 3.6 a,b | 1.7 b |
| EC1118 27.5°Brix | 3.9 a | 5.5 a | 3.8 c | 3.3 b | 2.4 a,b |
| CN127.5°Brix | 4.4 a | 5.2 ab | 3.8 c | 2.9 b | 2.8 a |
| Flavour | | | | | |
| Treatment | Red Fruit (Cooked/  Dried/Fresh) | Confection | Black Fruit | Spice | Vegetal |
| EC1118 Control | 7.7 a | 4.1 a | 5.3 b,c | 4.6 c | 2.9 b,c |
| CN1 Control | 7.5 a | 3.5 a,b | 4.7 c | 4.5 c | 3.6 a |
| EC1118 26.0°Brix | 7.6 a | 3.7 a,b | 5.1 b,c | 5.3 a,b,c | 2.9 b,c |
| CN1 26.0°Brix | 7.8 a | 3.0 b | 4.8 c | 4.9 b,c | 3.5 a,b |
| EC1118 27.5°Brix | 7.1 a | 3.4 a,b | 5.8 b | 5.6 a,b | 2.9 b,c |
| CN127.5°Brix | 7.2 a | 4.0 a | 6.8 a | 5.8 a | 2.8 c |
| Flavour | | | | | |
| Treatment | Herbal | Earthy/  Toast |  | | |
| EC1118 Control | 3.9 b | 3.7 b |
| CN1 Control | 4.6 a,b | 3.8 b |
| EC1118 26.0°Brix | 5.0 a | 4.2 b |
| CN1 26.0°Brix | 4.7 a,b | 4.1 b |
| EC1118 27.5°Brix | 5.4 a | 5.1 a |
| CN127.5°Brix | 4.9 a | 5.2 a |  | | |
| Oral sensations and prototypical tastes | | | | | |
| Treatment | Astringency | Alcohol | Acidity | Bitterness | Length of Finish |
| EC1118 Control | 5.8 b | 7.8 b | 7.9 b | 4.1 a | 8.0 c |
| CN1 Control | 6.1 b | 8.1 b | 8.6 a | 4.6 a | 7.9 c |
| EC1118 26.0°Brix | 6.2 b | 9.9 a | 7.2 c | 4.7 a | 9.6 b |
| CN1 26.0°Brix | 6.1 b | 8.1 b | 8.7 a | 4.7 a | 8.2 c |
| EC1118 27.5°Brix | 7.0 a | 10.3 a | 7.9 b | 4.8 a | 10.4 a |
| CN127.5°Brix | 6.4 b | 10.4 a | 7.2 c | 4.0 a | 10.3 a,b |
